# Supplementary material for: A two-photon ratiometric fluorescent probe for real-time imaging and quantification of NO in neural stem cells during activation regulation
Source: Royal Society of Chemistry journal article supplement (doi:10.1039/d2sc00326k), 2022-01-01
Supplement: d2sc00326k1.pdf [file d2sc00326k1.pdf]

*Electronic Supplementary Information*

**Two-photon ratiometric fluorescent probe for real-time imaging and quantification of NO in neural stem cells during activation regulation**

Mengyu Liang, Zhichao Liu\*, Zhonghui Zhang, Yuxiao Mei, Yang Tian\*

Department of Chemistry, School of Chemistry and Molecular Engineering, East China Normal University, Dongchuan Road 500, Shanghai 200241, China.

E-mail: ytian@chem.ecnu.edu.cn (Yang Tian), zcliu@chem.ecnu.edu.cn (Zhichao Liu)

**Contents**

1. Reagents and instruments
2. Measurements of two-photon cross section and FRET efficiency
3. Theoretical calculation and statistical analysis
4. Characterization of NOP and intermediates
5. The two-photon fluorescence emission spectra of NOP in cell lysates and cell lysates only
6. Selectivity and competition tests of NOP
7. The structures of NOP before and after reacted with NO
8. Two-photon fluorescence emission spectra of CM and NOP
9. Cytotoxicity and apoptosis assay of NOP probe
10. Western blot of EGFR and CD133 proteins in the used qNSCs
11. Fluorescence imaging of NSCs
12. Neurotoxicity of NO toward NSCs
13. FACS of qNSCs
14. Histology aligned to Allen Brain Atlas
15. The concentration of NO in neural stem cells and neurons
16. FACS of cells obtained from DG area
17. The comparison of the sensing properties of our developed NOP probe and the previously reported fluorescent ratiometric NO probes

## 1. Reagents and Instruments

Reagents: 2,2-Dimethyl-1,3-dioxane-4,6-dione, 4-bromo-1,8-naphthalic anhydride, 2-methoxyethanol, ethylenediamine and 2,4-dihydroxybenzaldehyde were purchased from Sinopharm- Reagent (China). 2-nitro-1,4-phenylenediamine, triethylamine (TEA), palladium on carbon (Pd/C, 10% Pd), NaH<sub>2</sub>PO<sub>2</sub>, NaClO, Na<sub>2</sub>S<sub>2</sub>O<sub>4</sub>, Na<sub>2</sub>SO<sub>4</sub>, NaNO<sub>2</sub>, NaHCO<sub>3</sub>, MnCl<sub>2</sub>·4H<sub>2</sub>O, NaCl, KCl, CuCl<sub>2</sub>·2H<sub>2</sub>O, MgCl<sub>2</sub>·6H<sub>2</sub>O, CaCl<sub>2</sub>, FeCl<sub>3</sub> and N,N-dimethylformamide (DMF) were obtained from Aladdin Chemistry (China). 3-(4,5-dimethyl-2-thiazolyl)-2,5-diphenyl-2H-tetrazolium bromide (MTT), ascorbic acid (AA), glucose, amino acid, and dimethyl sulfoxide (DMSO) were obtained from Sigma-Aldrich (U.S.A.). 2-(4-carboxyphenyl)-4,4,5,5-tetramethyl-imidazole-1-oxyl-3-oxide potassium (cPTIO), Threonine (Glu), Phenylalanine (Phe), Tyrosine (Tyr), Lysine (Lys), Cysteine (Cys), Histidine (His), Arginine (Arg), Valine (Val), Proline (Pro), Threonine (Thr), Serine (Ser), Leucine (Leu), Methionine (Met), Glycine (Gly). Poly-d-lysine (PDL), minimum essential medium (MEM) and phosphate-buffered saline (PBS) were obtained from Thermo Fisher Scientific. O-Benzotriazole-N, N, N', N'-tetramethyl-uronium-hexafluorophosphate (HBTU) were provided by Macklin (China).

Instruments: Milli-Q water purification system was used to purify deionized water. All NMR spectra were conducted from NMR spectrometer (500 MHz, Bruker, Germany). The Mass spectra (MS) were obtained with MS spectrometer (6800, Bruker, Germany). UV-vis absorption spectra were recorded on UV-vis spectrophotometer (UH5300, Hitachi, Japan). The fluorescence spectra were collected with fluorescence spectrophotometer (F-4500, Hitachi, Japan). Fourier transform infrared (FT-IR) spectra were performed with Fourier transform infrared spectrometer (Nicolet iS10, Thermo Fisher Scientific, U.S.A.). Fluorescence confocal imaging was collected by confocal scanning microscope with 63× oil objective (TCS-SP8, Leica, Germany).

## 2. Measurements of two-photon cross section and FRET efficiency.

The two-photon action cross section ( $\sigma\Phi$ ) was measured by using standard materials combined with femtosecond fluorescence measurement technology and Rhodamine 6G was used as reference. Firstly, the two-photon fluorescence intensity of 10  $\mu$ M NOP (10 mM PBS buffer containing ethanol, pH = 7.4) added with 50  $\mu$ M NO was carried out at 690-900 nm. The two-photon action cross section ( $\delta$ ) was calculated by using the following equation:

$$\delta_s = \delta_r \frac{\Phi_r C_r n_r F_s}{\Phi_s C_s n_s F_r}$$

Where the s and r refer to RBD and the reference solutions, respectively. The two-photon fluorescence intensity was described as F. The n and C are the refractive index and concentration of the sample solution, respectively. The  $\Phi$  and  $\delta$  represent the fluorescence quantum yield and the TPA cross section.

The FRET efficiency of NOP in the absence and in the presence of NO was calculated according to the following equation:

$$E = 1 - \frac{F_{DA}}{F_D}$$

E represents the FRET efficiency,  $F_D$  and  $F_{DA}$  represent the measured fluorescence intensities of the donor in the absence and in the presence of acceptor, respectively.

### 3. Theoretical calculation and statistical analysis.

The HOMO and LUMO of the molecules are calculated using Gaussian 09 suite. The geometry optimizations of the molecule were performed using density functional theory (DFT) with Becke's three-parameter hybrid exchange function with PBE1PBE and 6-311G basis set. No constraints to bonds/angles/dihedral angles were applied in the calculations and all atoms were free to optimize.

Data are expressed as means  $\pm$  SD of 3-4 samples in each experimental group. The Student t test was used to assess the statistical significance between a pair of experimental groups. P-values were generated by two-tailed t test assuming equal variance using IBM SPSS Statistics Software. The value 0.05 (\*), 0.01 (\*\*), and 0.001 (\*\*\*) was assumed as the level of significance for the statistic tests (n = 20; \*, P < 0.05; \*\*, P < 0.01; \*\*\*, P < 0.001; and NS means no statistical significance per unpaired t-test).

#### 4. Characterization of NOP and intermediates (Fig. S1-S15).

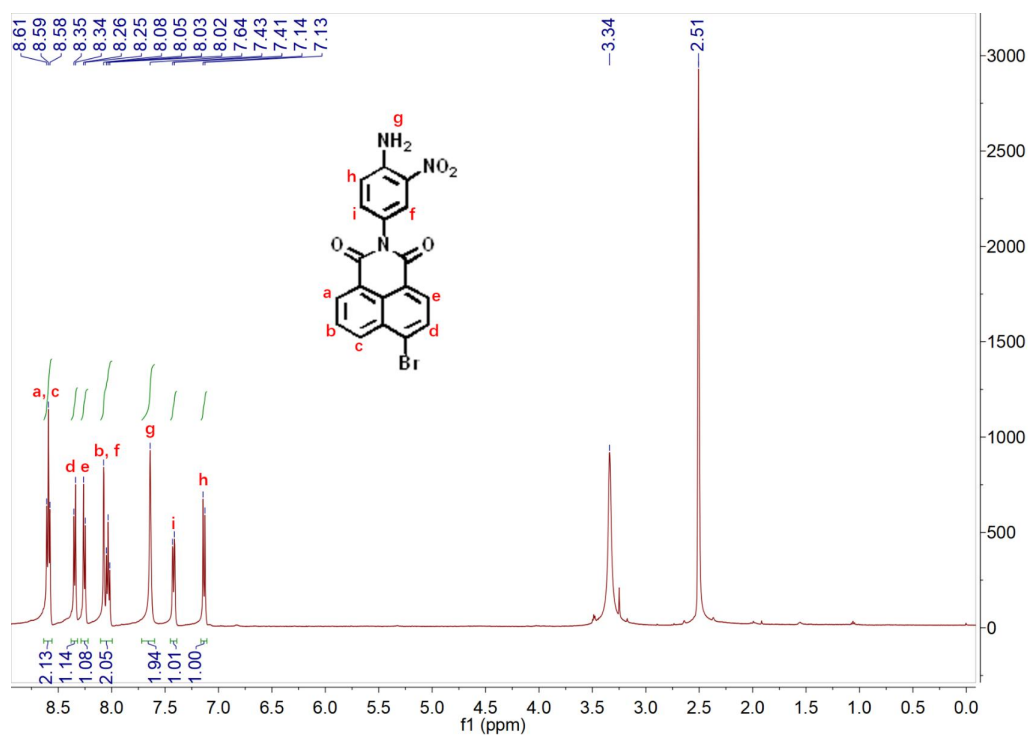

**Fig. S1**  $^1\text{H}$  NMR spectrum (500 MHz) of compound 1 in  $\text{DMSO-d}_6$ .

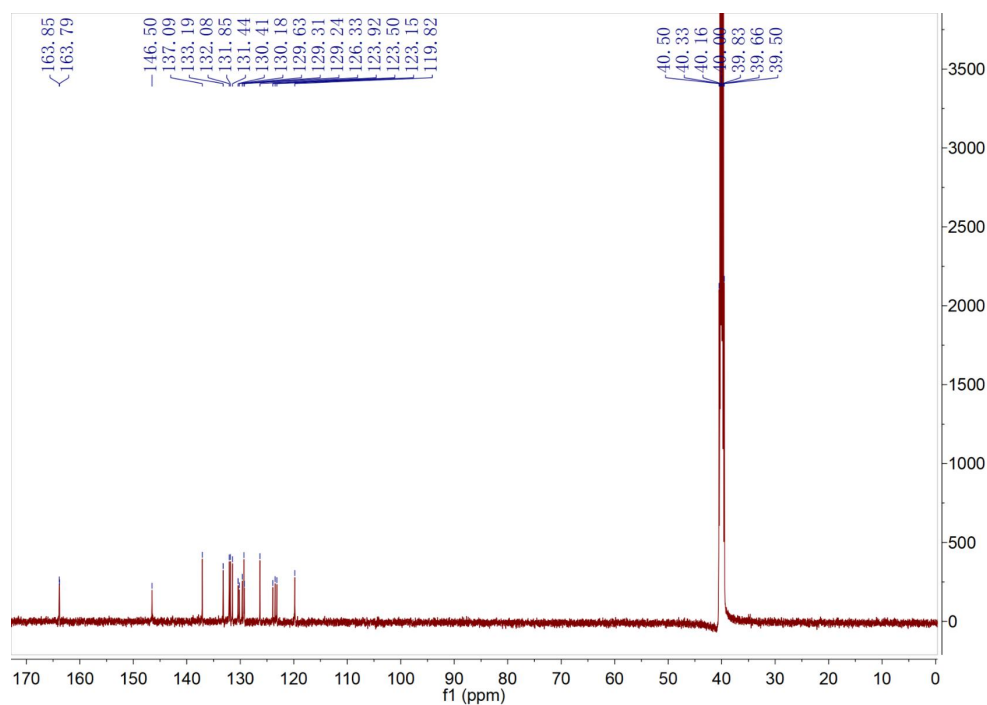

**Fig. S2**  $^{13}\text{C}$  NMR spectrum (500 MHz) of compound 1 in  $\text{DMSO-d}_6$ .

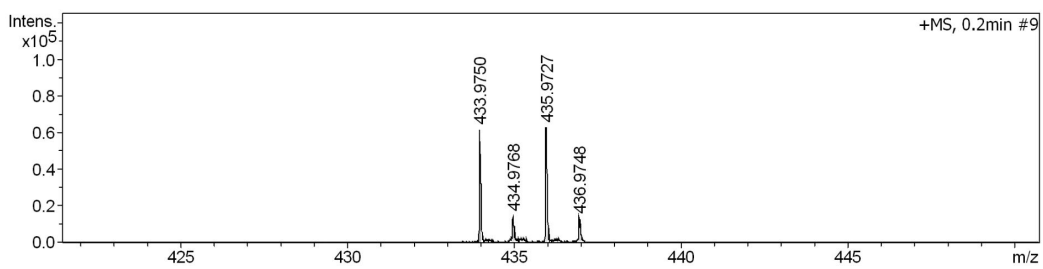

**Fig. S3** MS spectrum of compound 1.

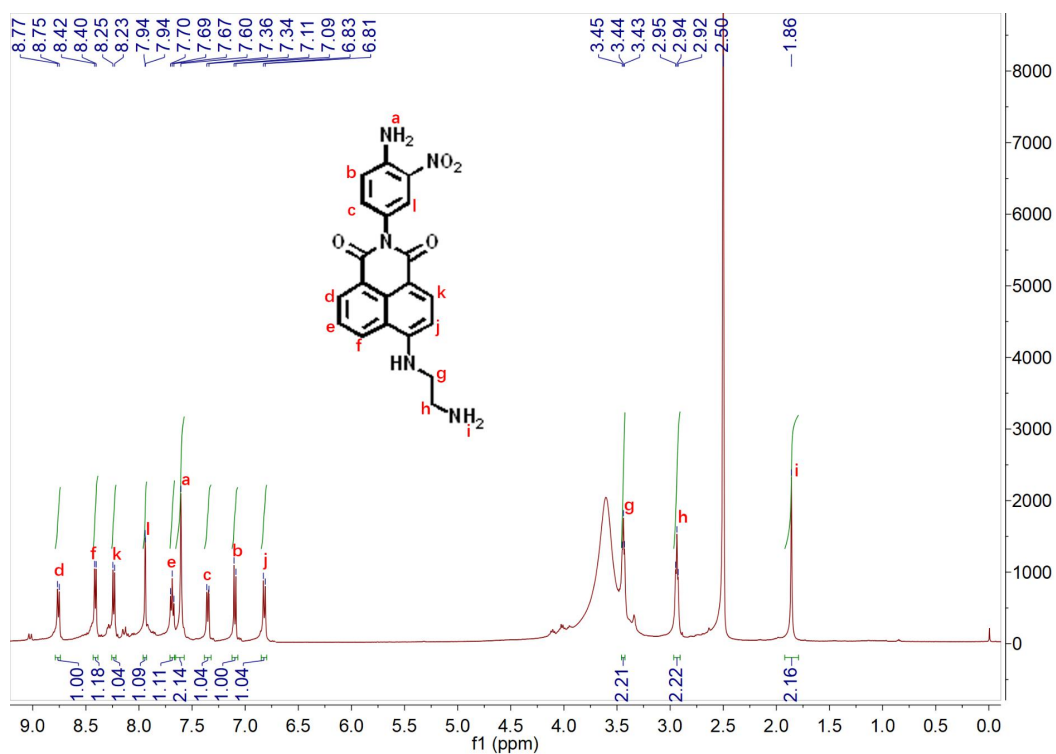

**Fig. S4** <sup>1</sup>H NMR spectrum (500 MHz) of compound 2 in DMSO-d<sub>6</sub>.

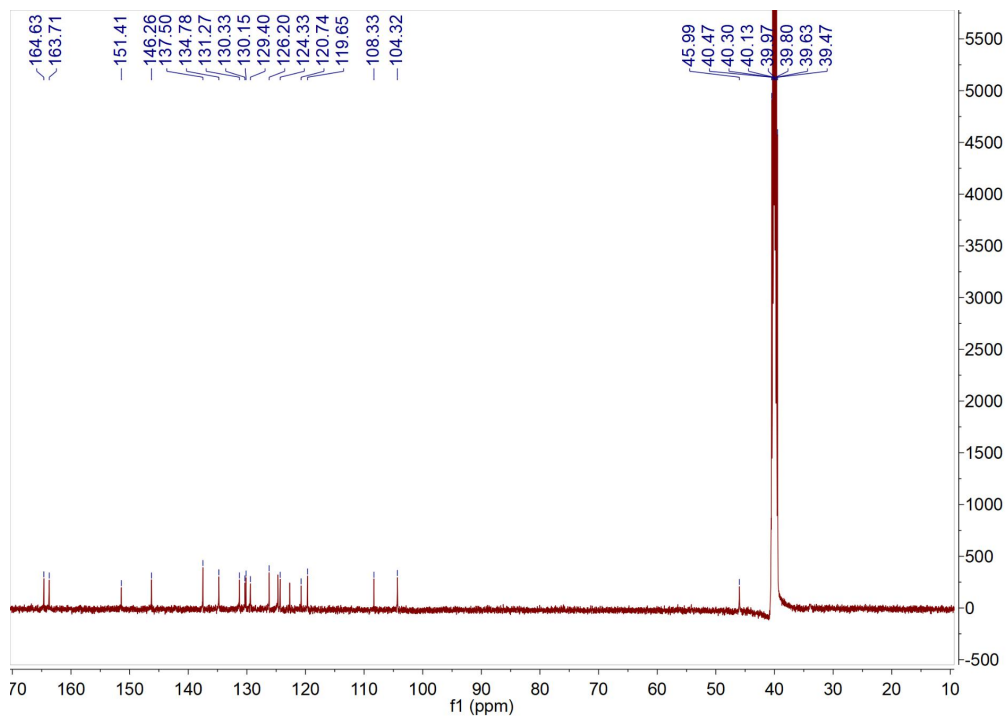

**Fig. S5**  $^{13}\text{C}$  NMR spectrum (500 MHz) of compound 2 in  $\text{DMSO-d}_6$ .

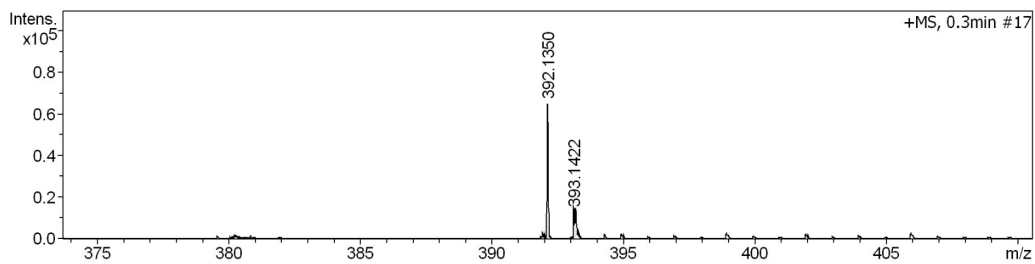

**Fig. S6** MS spectrum of compound 2.

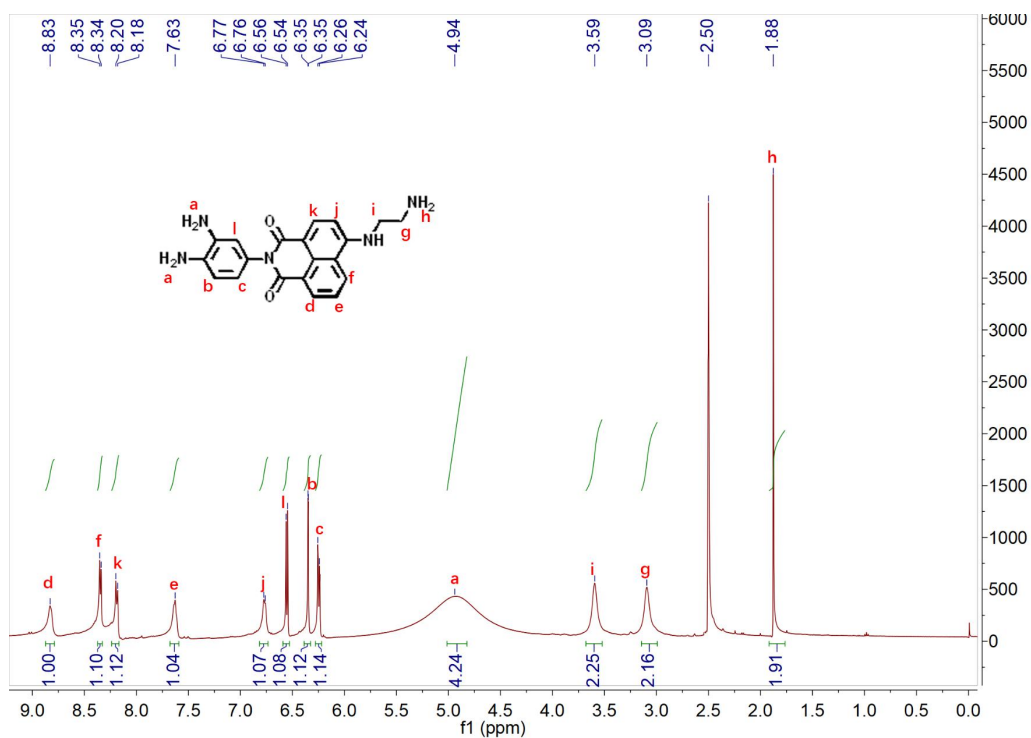

**Fig. S7** <sup>1</sup>H NMR spectrum (500 MHz) of NPM in DMSO-d<sub>6</sub>.

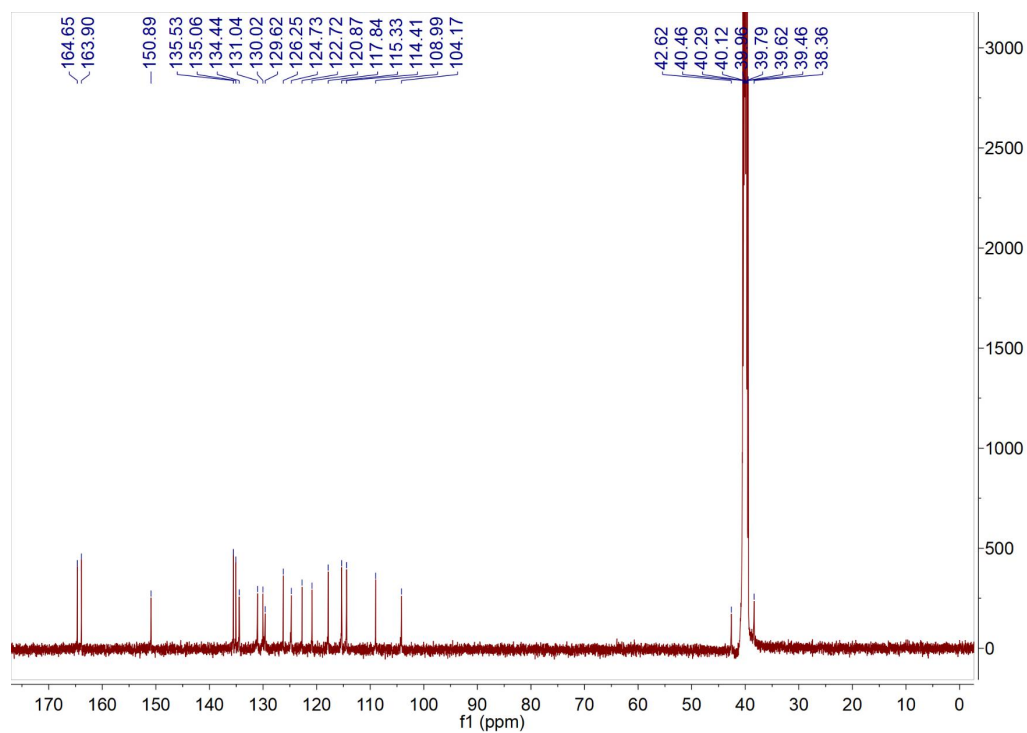

**Fig. S8** <sup>13</sup>C NMR spectrum (500 MHz) of NPM in DMSO-d<sub>6</sub>.

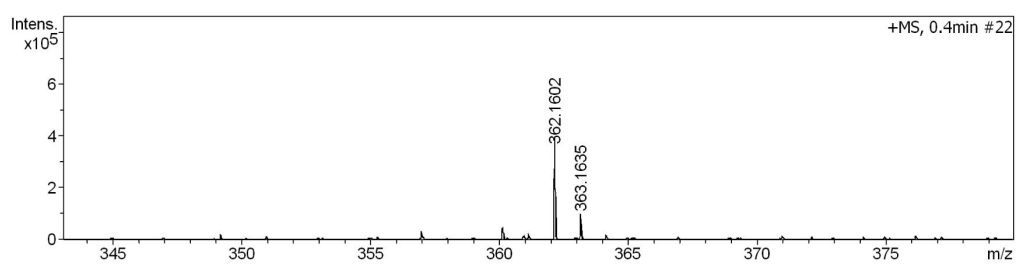

**Fig. S9** MS spectrum of NPM.

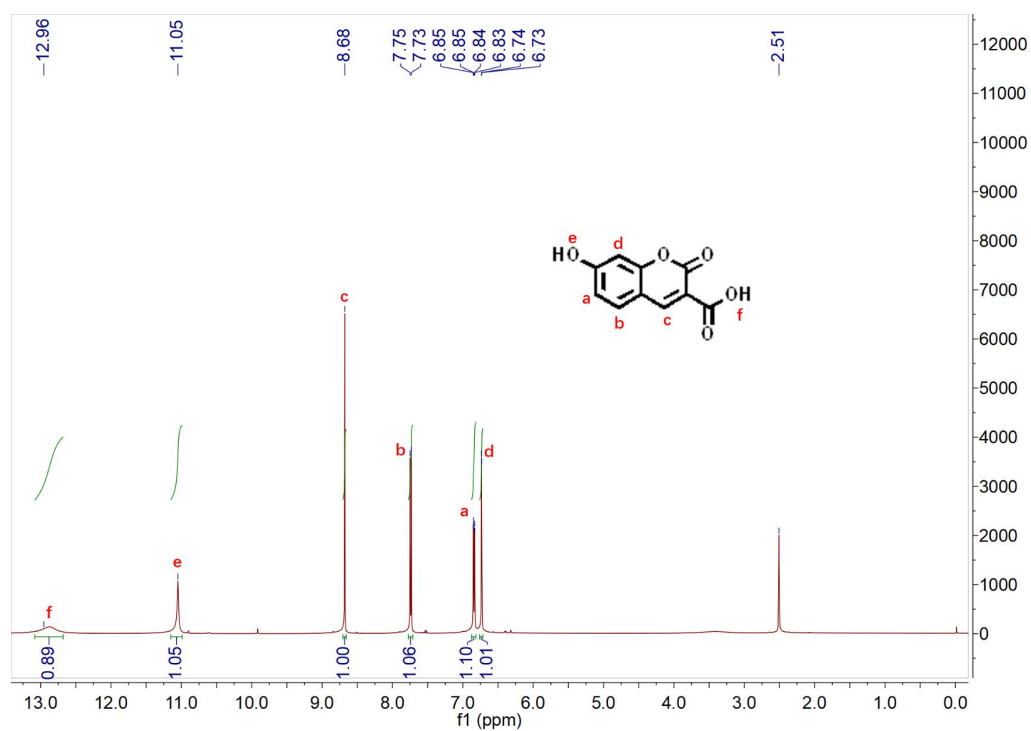

**Fig. S10**  $^1\text{H}$  NMR spectrum (500 MHz) of CM in  $\text{DMSO-d}_6$ .



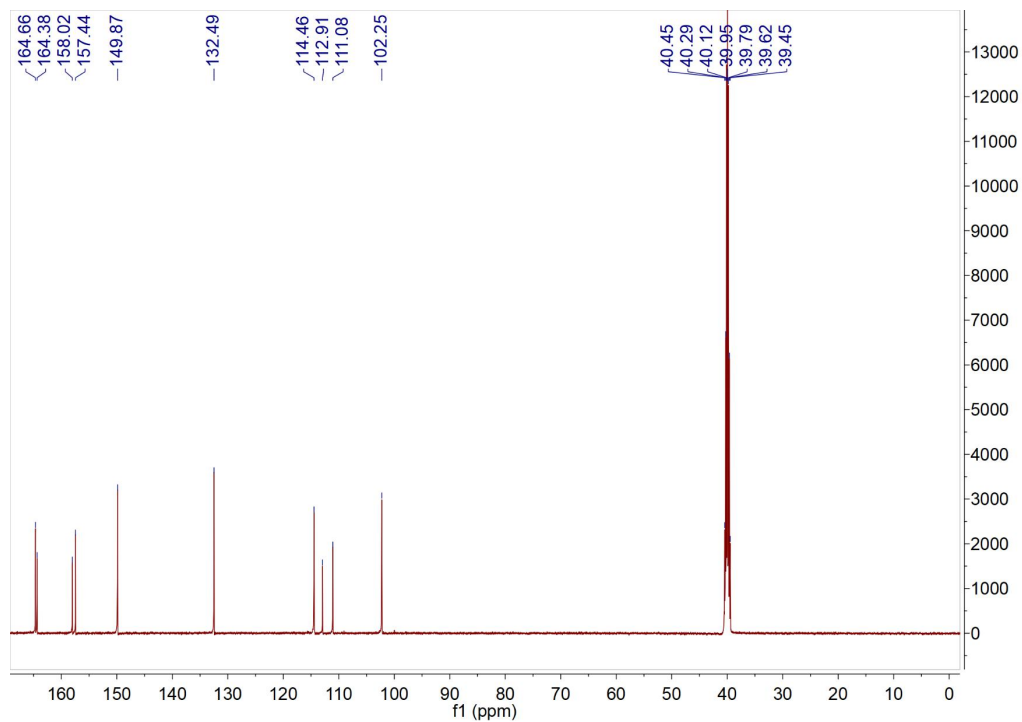

**Fig. S11**  $^{13}\text{C}$  NMR spectrum (500 MHz) of CM in  $\text{DMSO-d}_6$ .

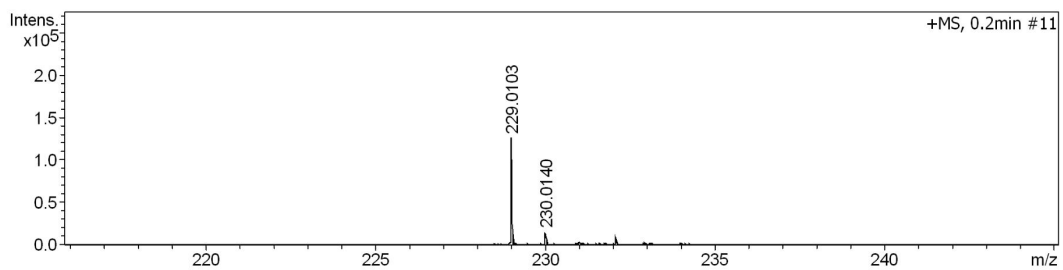

**Fig. S12** MS spectrum of CM.

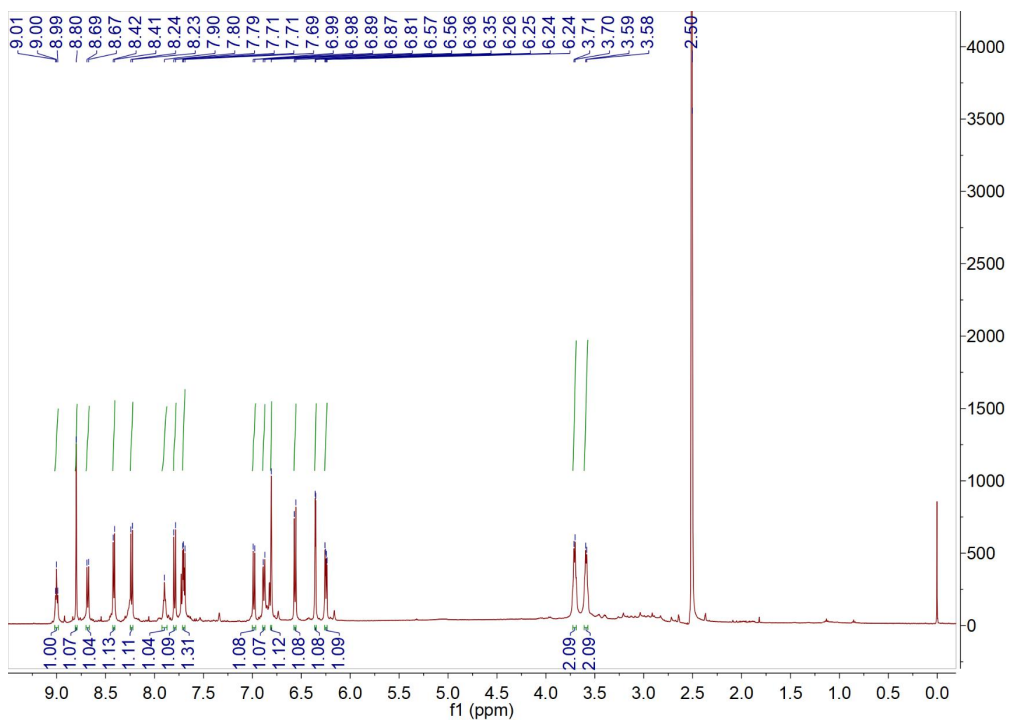

**Fig. S13**  $^1\text{H}$  NMR spectrum (500 MHz) of NOP in  $\text{DMSO-d}_6$ .

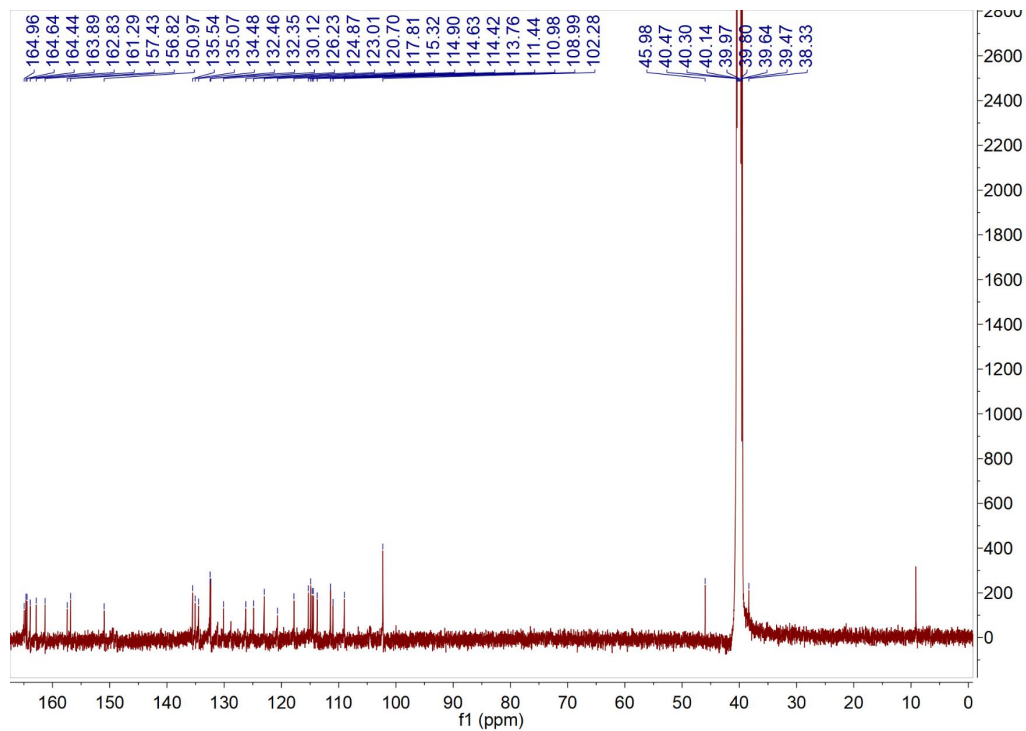

**Fig. S14**  $^{13}\text{C}$  NMR spectrum (500 MHz) of NOP in  $\text{DMSO-d}_6$ .

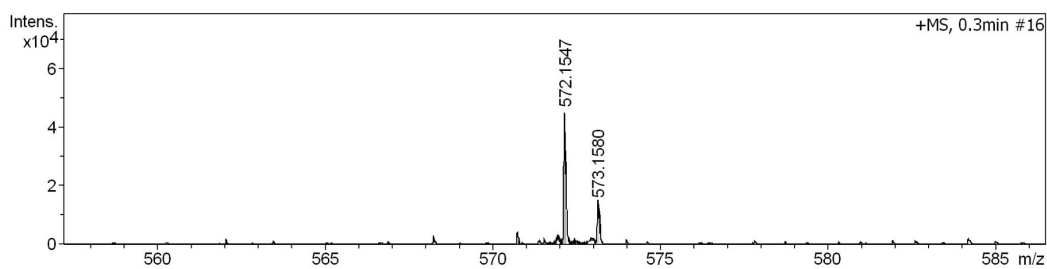

**Fig. S15** MS spectrum of NOP.

**5. The two-photon fluorescence emission spectra of NOP in cell lysates and cell lysates only (Fig. S16).**

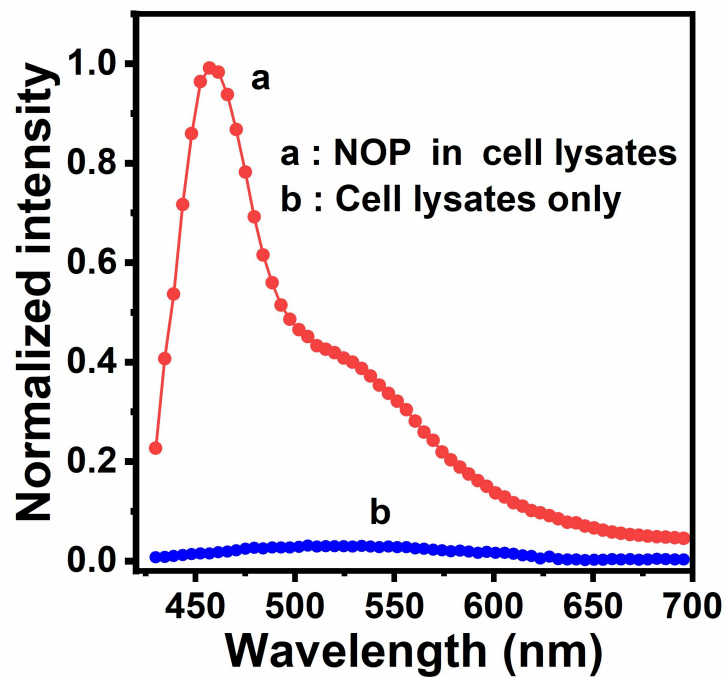

**Fig. S16** TPF emission spectra of (a) NOP in cell lysates and (b) cell lysates only under the excitation of 700 nm, respectively.

**6. Selectivity and competition tests of NOP toward metal ions, amino acids and neurotransmitters (Fig. S17).**

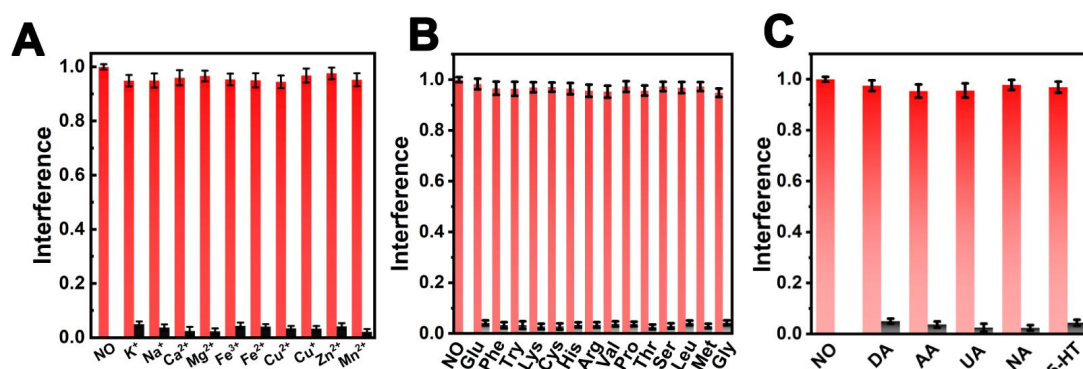

**Fig. S17** Selectivity and competition tests of NOP toward (A) metal ions, (B) amino acids (100  $\mu$ M) and (C) neurotransmitters (50  $\mu$ M), respectively. The black bars represent the influence of potential interferences to NOP probe. The red bars represent the subsequent addition of 100  $\mu$ M NO to the NOP solution with potential interferences. The concentrations of  $K^+$ ,  $Na^+$  and  $Ca^{2+}$ : 100 mM, 50 mM and 10 mM, respectively. The concentration of  $Mg^{2+}$ ,  $Fe^{3+}$ ,  $Fe^{2+}$ ,  $Cu^{2+}$ ,  $Cu^+$ ,  $Zn^{2+}$ ,  $Mn^{2+}$ : 300  $\mu$ M.

**7. Two-photon fluorescence emission spectra of CM and NOP (Fig. S19).**

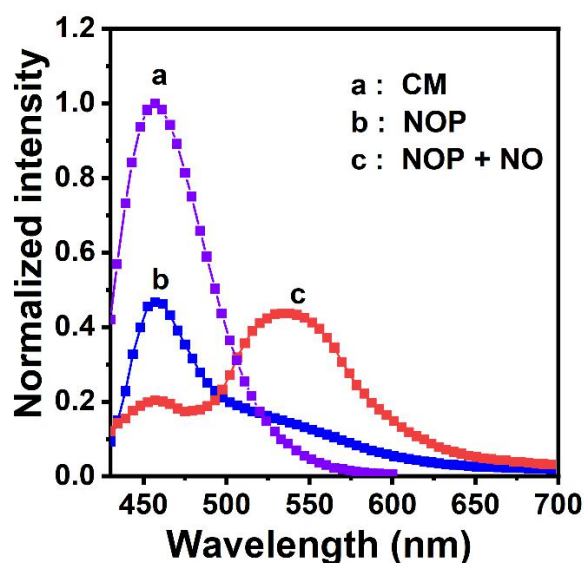

**Fig. S18** Two-photon fluorescence emission spectra of (a) CM, (b) NOP in the absence and (c) in the presence of NO (200.0  $\mu$ M), respectively.

8. The structures of NOP before and after reacted with NO (Fig. S18).

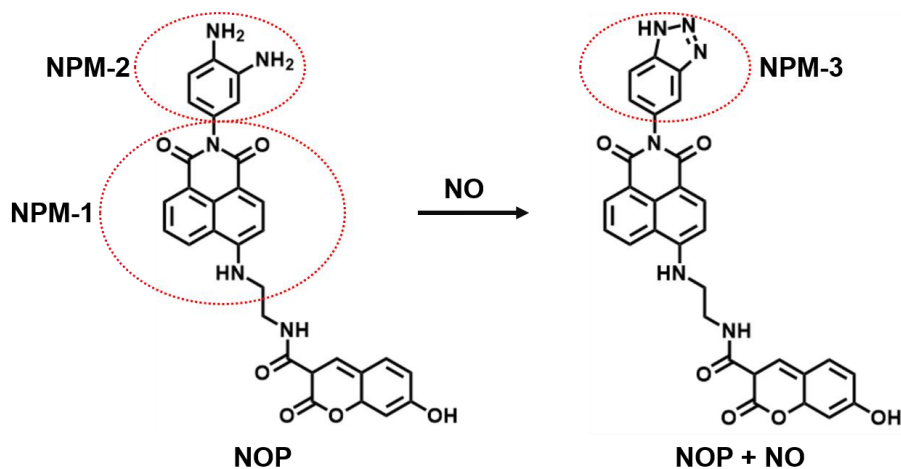

Fig. S19 Molecule structures of NOP before and after reacted with NO, respectively.

9. Cytotoxicity and apoptosis assay of NOP probe (Fig. S20-S22).

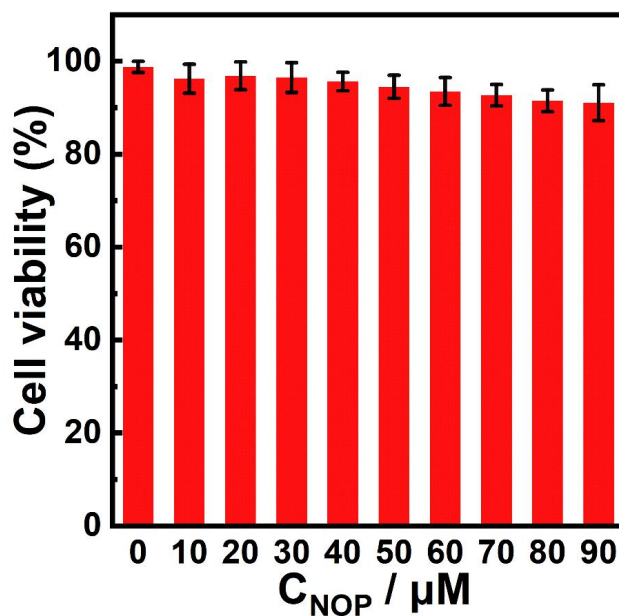

Fig. S20 Viabilities of NSCs after incubated with different concentrations of NOP probe for 48 h at 37 °C, respectively.

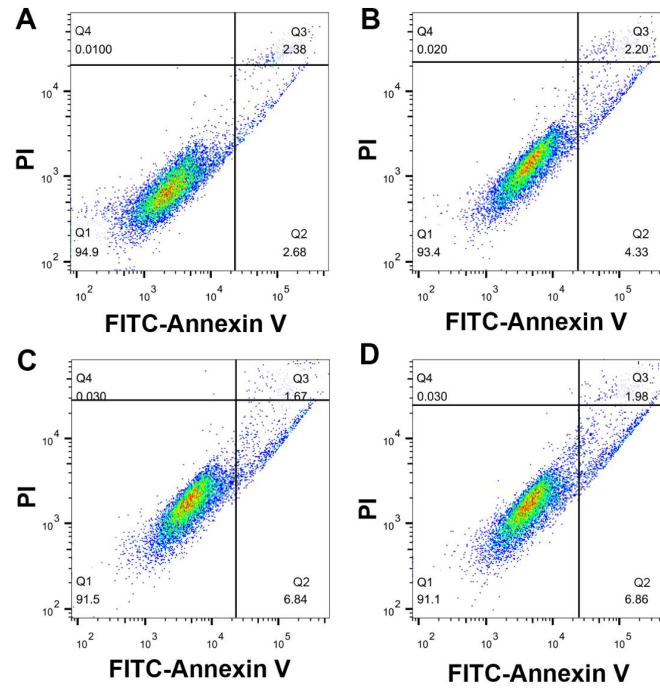

**Fig. S21** Cell apoptosis assay of NSCs after incubated with different concentrations of NOP for 48 h (A) 0 μM, (B) 30 μM, (C) 60 μM, (D) 90 μM. Q1, Q2, Q3 and Q4 represent living cells, early apoptotic cells, late apoptotic cells, and dead cells, respectively.

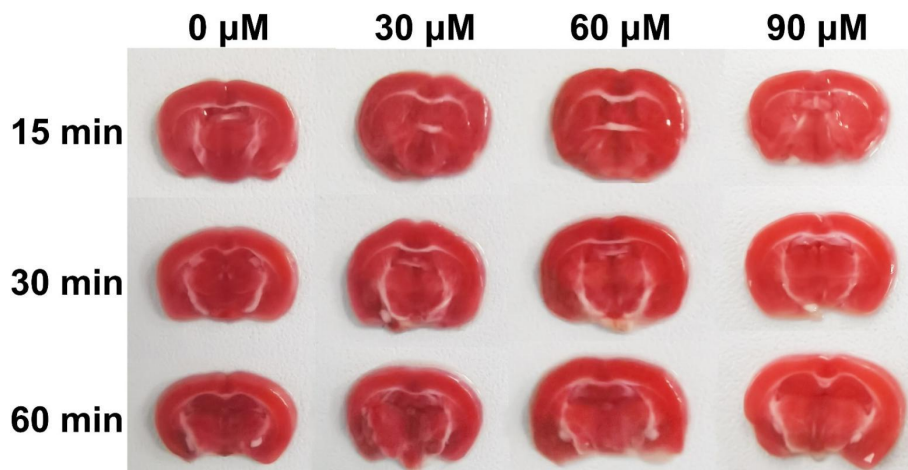

**Fig. S22** TTC staining of brain tissues obtained from the live mouse brain after incubated with different concentrations of NOP (0, 30, 60, 90 μM) for different times (15, 30 and 60 min)

10. Western blot of EGFR and CD133 proteins in the used qNSCs (Fig. S23).

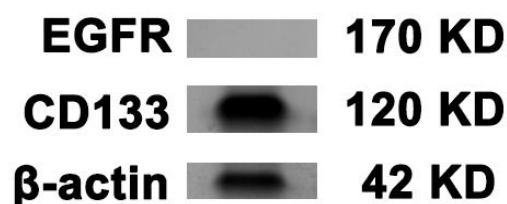

**Fig. S23** Western blot analysis for the levels of EGFR and CD133 proteins in the used qNSCs.

11. Fluorescence imaging of NSCs (Fig. S24-S25).

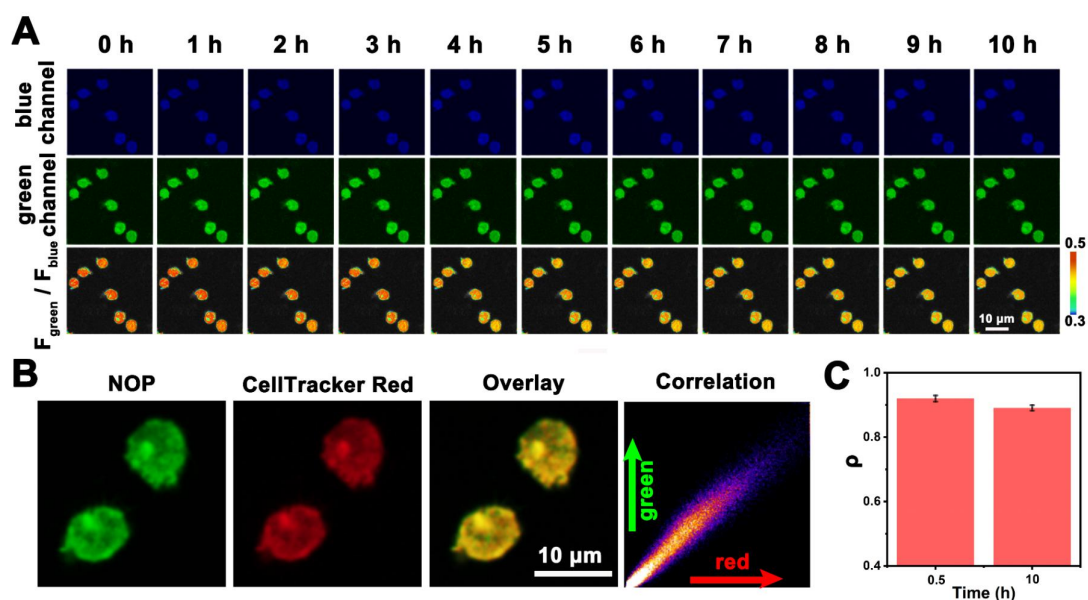

**Fig. S24** (A) Fluorescence imaging of NSCs treated with NOP (10  $\mu$ M) for 20 min and collected from blue, green and  $F_{green}/F_{blue}$  channels. (B) Colocalization images of qNSCs incubated with NOP and CellTracker Red for 10 h. (C) Pearson's coefficient ( $\rho$ ) obtained from incubated with NOP and CellTracker Red for 0.5 h and 10 h.

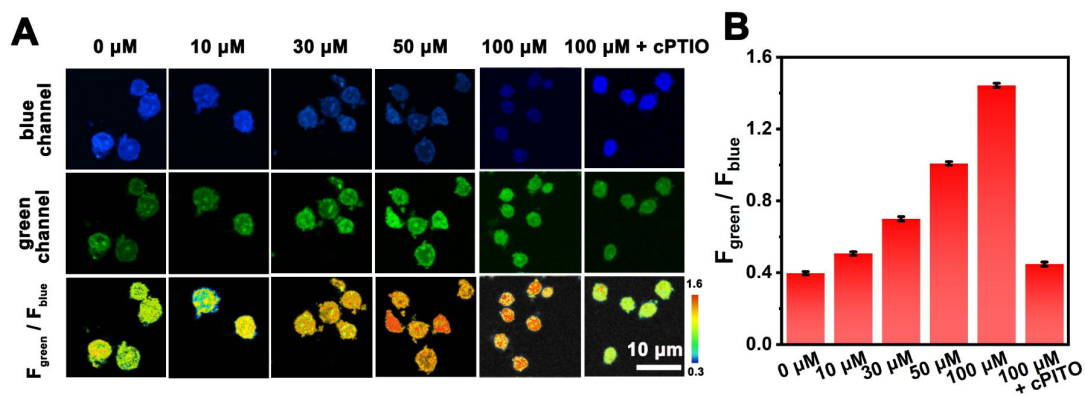

**Fig. S25** (A) Fluorescence imaging of NSCs incubated with NOP probe collected from different channels under the stimulation of different concentrations of NO (0, 10, 30, 50, and 100 μM), and 100 μM NO in the presence of cPTIO (150 μM). (B) Summarized data for  $F_{\text{green}}/F_{\text{blue}}$  value obtained from (A).

## 12. Neurotoxicity of NO toward NSCs (Fig. S26).

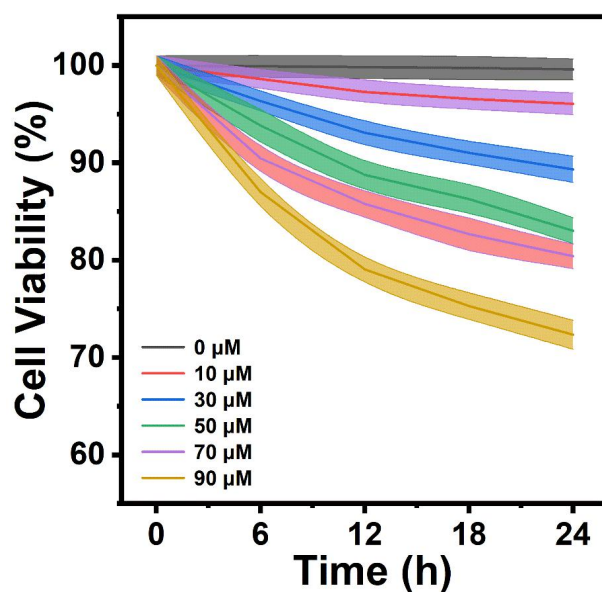

**Fig. S26** Summarized data of NSCs viability stimulated by different concentrations of NO (0, 10, 30, 50, 70, 90 μM) for different times (0, 6, 12, 18, 24 h).



### 13. FACS of qNSCs (Fig. S27).

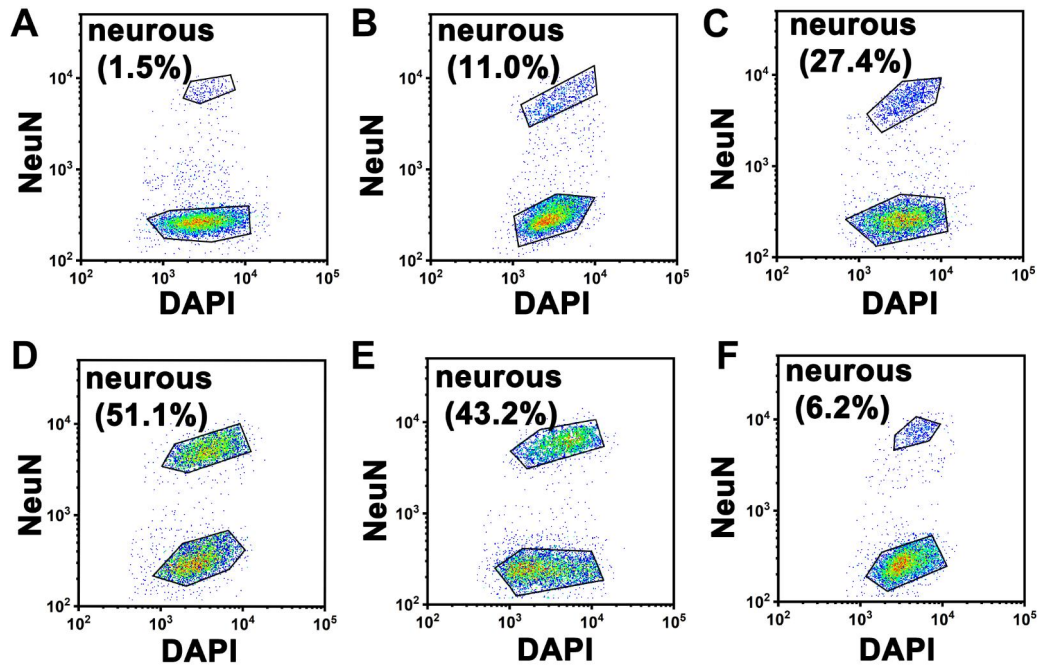

**Fig. S27** FACS results of qNSCs after stimulated by (A) 0  $\mu$ M, (B) 10  $\mu$ M, (C) 30  $\mu$ M, (D) 50  $\mu$ M, (E) 70  $\mu$ M of NO, and (F) 70  $\mu$ M of NO in the presence of cPTIO for 300 s, and then the stimulated qNSCs were cultured for 24 h (n=5, S. D.).

### 14. Histology aligned to Allen Brain Atlas (Fig. S28).

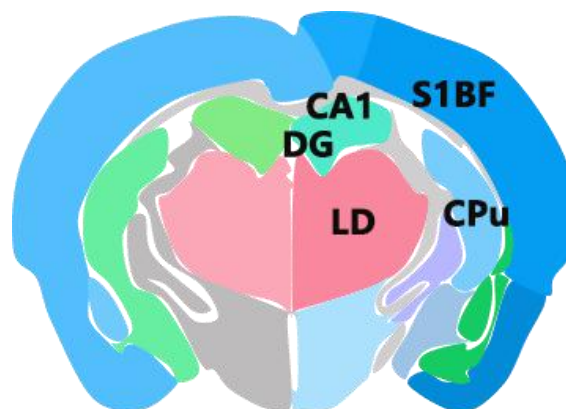

**Fig. S28** Histology aligned to Allen Brain Atlas.

15. The concentration of NO in qNSCs and neurons (Fig. S29).

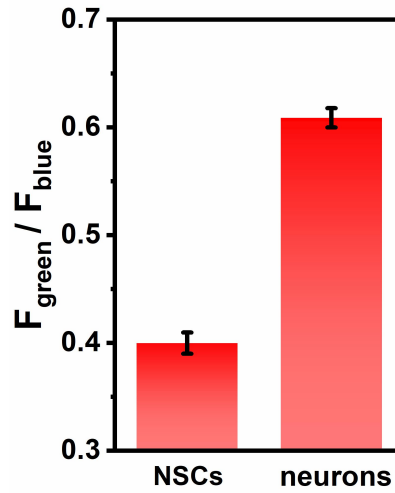

**Fig. S29** Summarized data for  $F_{\text{green}}/F_{\text{blue}}$  value obtained from qNSCs and neurons. (n=50, S. D.)

16. FACS of cells obtained from DG area (Fig. S30)

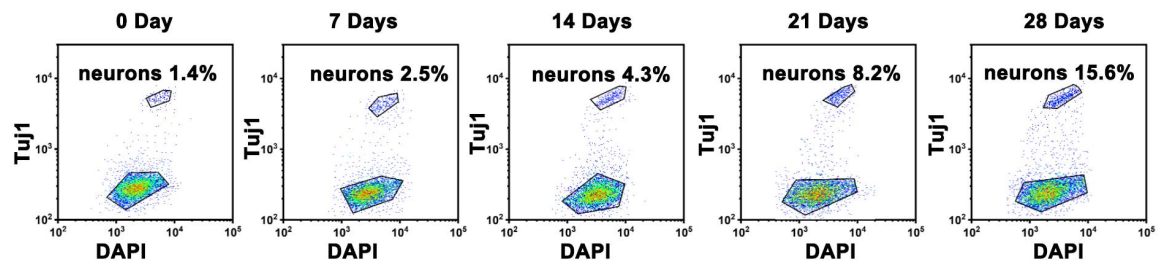

**Fig. S30** FACS results of cells obtained from DG area after the AD mice were treated with aNSCs for different times (0, 7, 14, 21 and 28 days), respectively.

**17. The comparison of the sensing properties of our developed NOP probe and the previously reported fluorescent ratiometric NO probes.**

**Table S1.** The comparison of the sensing properties of our developed NOP probe and the previously reported fluorescent ratiometric NO probes.

| Probes           | Response time | Detection Linear range  | Detection limit    | References |
|------------------|---------------|-------------------------|--------------------|------------|
| TRP-NO           | 50 min        | 5.0-160.0 $\mu\text{M}$ | 1.8 $\mu\text{M}$  | S1         |
| Prober 1         | 10 min        | 0.0-20.0 $\mu\text{M}$  | 17.0 nM            | S2         |
| Cu (FL3A-Ppz-CC) | 2 min         | 0.0-6.0 $\mu\text{M}$   | 21.0 nM            | S3         |
| AC-SA            | 15 min        | 0.0-700.0 nM            | 4.05 nM            | S4         |
| Rh-NO-P          | 20 s          | 0.5-12.0 $\mu\text{M}$  | 51.3 nM            | S5         |
| Hoe-Rh-NO        | 20 s          | 0.0-40.0 $\mu\text{M}$  | 58.0 nM            | S6         |
| FP-NO            | 20 s          | 0.25-2.00 $\mu\text{M}$ | 47.6 nM            | S7         |
| Mito-N           | 20 min        | 0.0-40.0 $\mu\text{M}$  | 21.0 $\mu\text{M}$ | S8         |
| RBD@AuNCs        | 55 s          | 0.5-120.0 $\mu\text{M}$ | 105.0 nM           | S9         |
| NOP              | 15 s          | 0.100-200 $\mu\text{M}$ | 19.5 nM            | Our work   |

References:

- [S1] Z. Dai, L. Tian, B. Song, X. Liu and J. Yuan, *Chem. Sci.*, 2017, 8, 1969-1976.
- [S2] L. Chen, D. Wu and J. Yoon, *Sens. Actuators B Chem.*, 2018, 259, 347-353.
- [S3] A. Loas and S. J. Lippard, *J. Mater. Chem. B*, 2017, 5, 8929-8933.
- [S4] P. Liu, B. Li, J. Zheng, Q. Liang, C. Wu, L. Huang, P. Zhang, Y. Jia, and S. Wang, *Sens. Actuators B Chem.*, 2021, 329, 129147.
- [S5] X. Wang, Q. Sun, X. Song, Y. Wang and W. Hu, *RSC Adv.*, 2022, 12, 2721-2728.
- [S6] L. Zhao, Z. Huang, D. Ma, Y. Yan, X. Zhang and Y. Xiao, *Analyst*, 2021, 146, 4130-4134.
- [S7] Q. Han, J. Liu, Q. Meng, Y. Wang, H. Feng, Z. Zhang, Z. Xu and R. Zhang, *ACS Sens.*, 2019, 4, 309-316.
- [S8] X. Zhu, J. Chen, C. Ma, X. Liu, X. Cao and H. Zhang, *Analyst*, 2017, 142, 4623-4628.
- [S9] Z. Gong, Z. Liu, Z. Zhang, Y. Mei and Y. Tian, *CCS chem.*, 2021, 3, 2201-2211.
